# Supplementary material for: Observation of intramolecular vibrations cooperating with the magnetic phase transition in a nickel-bis-dithiolene compound
Source: Royal Society of Chemistry journal article supplement (doi:10.1039/c2dt31519j), 2012-12-06
Supplement: c2dt31519j.pdf [file c2dt31519j.pdf]

## **Observation of intramolecular vibrations cooperating with the magnetic phase transition in a nickel-bis-dithiolene compound**

Shan-Shan Yu,<sup>a</sup> Hai-Bao Duan<sup>a</sup>, Xuan-Rong Chen,<sup>a</sup> Zheng-Fang Tian,<sup>a</sup> Xiao-Ming Ren<sup>\*a,b</sup>

<sup>a</sup> State Key Laboratory of Materials-Oriented Chemical Engineering and College of Science, Nanjing University of Technology, Nanjing 210009, P.R. China

<sup>b</sup> State Key Laboratory & Coordination Chemistry Institute, Nanjing University, Nanjing 210093, P. R. China

Tel.: +86-25-58139476

Fax: +86-25-58139481

E-mail: [xmren@njut.edu.cn](mailto:xmren@njut.edu.cn)

**Table S1** Selected bond lengths [Å] and angles [°] for **2** at 296 K

|                  |            |                  |            |
|------------------|------------|------------------|------------|
| Ni(1)-S(4)       | 2.1463(11) | Ni(1)-S(2)       | 2.1529(10) |
| Ni(1)-S(3)       | 2.1470(10) | Ni(1)-S(1)       | 2.1492(10) |
| S(1)-C(2)        | 1.725(4)   | S(2)-C(3)        | 1.721(4)   |
| S(3)-C(6)        | 1.714(4)   | S(4)-C(7)        | 1.711(4)   |
| N(1)-C(1)        | 1.142(5)   | N(2)-C(4)        | 1.138(4)   |
| N(3)-C(5)        | 1.136(4)   | N(4)-C(8)        | 1.142(5)   |
| N(5)-C(13)       | 1.305(4)   | N(5)-C(16)       | 1.376(4)   |
| N(5)-C(12)       | 1.472(4)   | N(6)-C(13)       | 1.324(4)   |
| N(6)-C(15)       | 1.344(4)   | N(6)-C(14)       | 1.476(4)   |
| C(1)-C(2)        | 1.428(5)   | C(3)-C(2)        | 1.358(5)   |
| C(3)-C(4)        | 1.432(5)   | C(5)-C(6)        | 1.434(5)   |
| C(6)-C(7)        | 1.358(4)   | C(7)-C(8)        | 1.432(4)   |
| C(9)-C(10)       | 1.511(4)   | C(10)-C(11)      | 1.526(5)   |
| S(4)-Ni(1)-S(3)  | 92.61(4)   | S(4)-Ni(1)-S(1)  | 178.85(4)  |
| S(3)-Ni(1)-S(1)  | 87.48(4)   | S(4)-Ni(1)-S(2)  | 87.31(4)   |
| S(1)-Ni(1)-S(2)  | 92.62(4)   | S(3)-Ni(1)-S(2)  | 178.97(4)  |
| C(2)-S(1)-Ni(1)  | 103.23(12) | C(3)-S(2)-Ni(1)  | 102.97(12) |
| C(6)-S(3)-Ni(1)  | 103.26(12) | C(7)-S(4)-Ni(1)  | 102.93(12) |
| C(13)-N(5)-C(16) | 107.2(12)  | C(13)-N(5)-C(12) | 128.1(3)   |
| C(16)-N(5)-C(12) | 124.5(3)   | C(13)-N(6)-C(15) | 107.8(3)   |

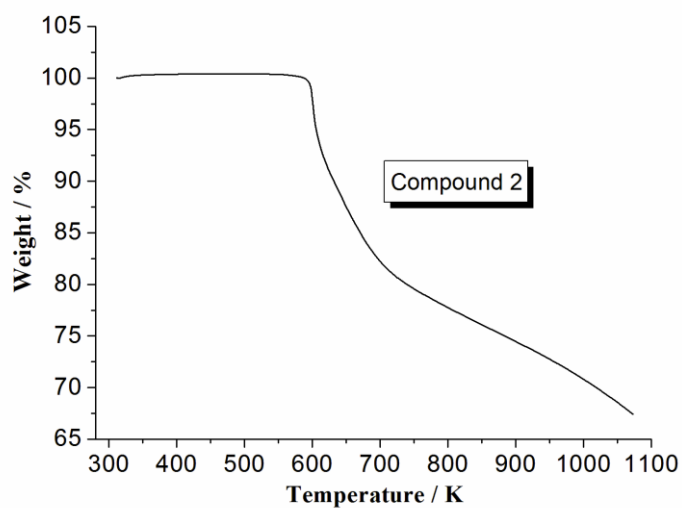

**Figure S1** TGA curve for **2** in the temperature range of 311-1113 K

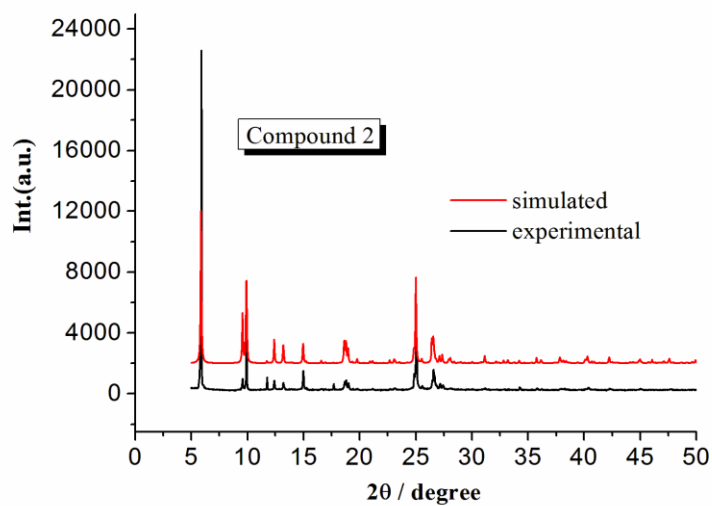

Figure S2 Powder X-ray diffraction profiles at 25 °C (experimental and simulated profiles) of **2**, indicating high phase purity of polycrystalline sample

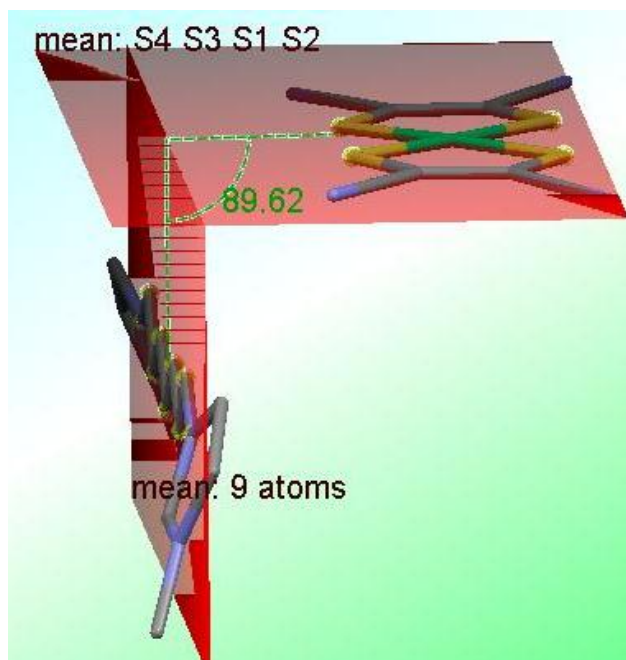

Figure S3 The plane consisted of the carbon atoms in hydrocarbon chain is approximately perpendicular to the anion plane in the crystal of **2** at room temperature

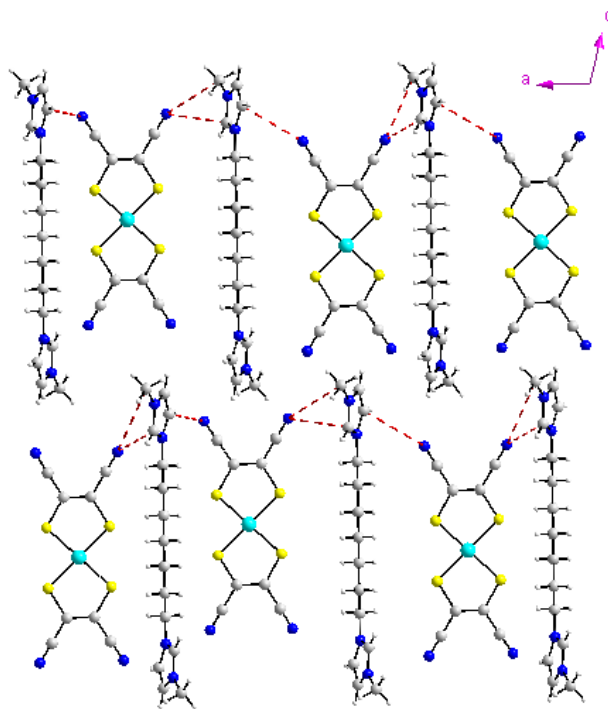

Figure S4 C-H...N interactions between the adjacent anionic and cationic stacks in **2**.

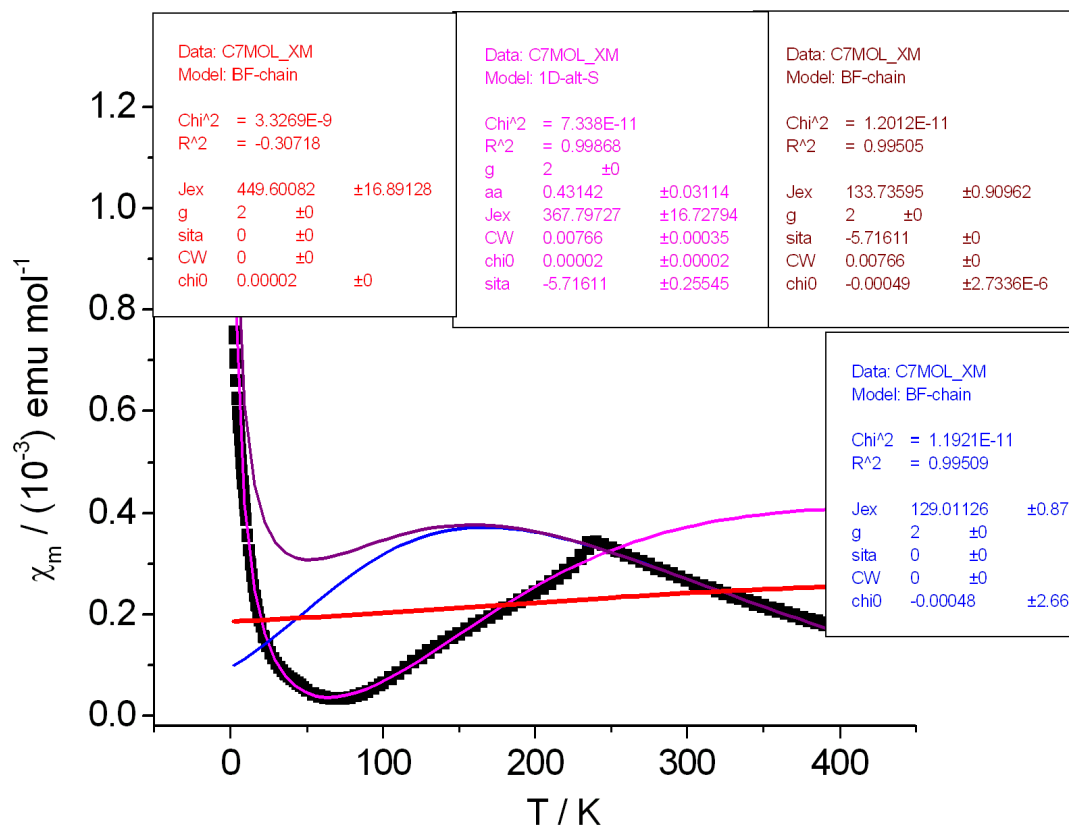

**Figure S5** Plot of  $\chi_m$  vs.  $T$  for **2** (the solid squares: experimental data over the temperature range 1.8-400 K; red, blue, wine and magenta lines: theoretically reproduced curves using the fitted parameters in the temperature range 245-400 K and 1.8-195 K, respectively; more details see the main text).
